# Supplementary material
Source: ML conference proceedings conference paper supplement (https://openreview.net/forum?id=L3yugOksj6)
Supplement: supplementary_material [file indoor.xls]

## Sheet: mate30
id	num
16	47
20	18
28	60
29	52
40	37
44	42
45	30
46	48
50	36
53	35
56	31
57	41
59	38
62	9
66	42
68	39
69	52
75	37
95	44
97	23
102	22

## Sheet: P30pro
id	num
23	5
27	5
31	4
47	5
48	7
49	8
50	7
73	4
81	5
86	7
91	8
96	6
98	4
102	5
136	20
138	10
139	15
140	10
147	16
172	10
181	12
182	13
184	10
186	6
198	8
264	6
282	10
311	8
326	6

## Sheet: iphonepm
id	num

## Sheet: vivo
id	num
11	12
12	28
16	25
22	12
25	19
27	11
30	19
33	30
37	21
40	22
42	15
46	19
49	15
54	25
67	42

## Sheet: xiaomi11pro
id	num

## Sheet: xiaomi13
id	num
3	19
