# Supplementary material
Source: ML conference proceedings conference paper supplement (https://openreview.net/forum?id=L3yugOksj6)
Supplement: supplementary_material [file special.xls]

## Sheet: P30pro
id	num
29	5
42	8
43	9
45	7
51	9
77	7
97	5
101	6
103	17
104	12
125	12
126	10
127	8
128	12
160	8
163	10
164	15
165	13
166	15
168	13
197	10
203	10
205	5
206	15
211	5
218	12
219	11
220	11
224	8
226	9
227	10
229	8
234	10
239	9
241	12
245	8
246	13
249	8
250	12
251	17
252	7
254	11
256	8
257	13
260	11
261	10
263	5
265	13
268	11
270	8
275	10
276	8
277	8
278	6
280	6
289	5
290	9
293	6
296	7
297	7
299	8
300	6
301	11
302	7
304	6
305	6
306	11
307	6
309	4
317	9
318	9

## Sheet: mate30
id	num
4	34
5	32
6	31
9	32
10	40
11	40
12	32
13	37
14	36
15	60
17	54
18	37
19	30
21	31
81	32
82	41
84	51
85	50

## Sheet: vivo
id	num
5	19
6	18
7	21
17	15
19	15
26	16
59	34
60	41
61	34
64	30
66	35
69	43
70	49
