# Supplementary material
Source: ML conference proceedings conference paper supplement (https://openreview.net/forum?id=L3yugOksj6)
Supplement: supplementary_material [file test.xls]

## Sheet: mate30
id	num
16	47
20	18
28	60
29	52
40	37
44	42
45	30
46	48
50	36
53	35
56	31
57	41
59	38
62	9
66	42
68	39
69	52
75	37
86	36
87	30
91	33
95	44
97	15
99	22
100	16
102	22

## Sheet: P30pro
id	num
23	5
24	4
27	5
31	4
36	10
37	7
38	4
47	5
48	7
49	8
50	7
63	8
66	4
70	5
73	4
81	5
85	11
86	7
91	8
95	4
96	6
98	4
102	5
115	7
118	25
121	10
123	11
134	9
136	20
138	10
139	15
140	10
145	14
147	16
148	11
149	10
150	12
155	15
156	7
158	15
172	10
181	12
182	13
184	10
186	6
189	8
191	11
193	11
198	8
200	8
201	9
202	11
204	14
207	10
210	7
212	8
216	10
221	13
228	10
232	9
235	4
240	12
242	6
253	8
255	7
264	6
267	8
274	8
282	10
285	5
288	11
294	4
311	8
320	7
326	6

## Sheet: iphonepm
id	num
2	21
11	19
17	23
18	26
19	20
20	20
25	16
31	10
34	24
36	20
37	17
40	10
41	10
43	20
49	17
53	16
54	20
55	16
57	16
64	19
66	20
72	20
75	36
78	39
80	40
81	36
87	34
88	38

## Sheet: vivo
id	num
11	12
12	28
16	25
22	12
25	19
27	11
30	19
33	30
37	21
40	22
42	15
46	19
49	15
54	25
55	20
65	34
67	42
71	50

## Sheet: xiaomi11pro
id	num
2	40
4	40
9	30
13	40
15	39
16	30
20	60
21	40
23	60
43	40
48	38
49	36
51	50
54	38
57	40
59	31
66	35
77	31
79	30
89	31
91	24

## Sheet: xiaomi13
id	num
2	20
3	19
4	19
5	30
6	64
7	46
9	14
10	15
11	9
12	4
13	11
18	6
39	6

## Sheet: all
id	num
16	47
20	18
28	60
29	52
40	37
44	42
45	30
46	48
50	36
53	35
56	31
57	41
59	38
62	9
66	42
68	39
69	52
75	37
86	36
87	30
91	33
95	44
97	15
99	22
100	16
102	22
23	5
24	4
27	5
31	4
36	10
37	7
38	4
47	5
48	7
49	8
50	7
63	8
66	4
70	5
73	4
81	5
85	11
86	7
91	8
95	4
96	6
98	4
102	5
115	7
118	25
121	10
123	11
134	9
136	20
138	10
139	15
140	10
145	14
147	16
148	11
149	10
150	12
155	15
156	7
158	15
172	10
181	12
182	13
184	10
186	6
189	8
191	11
193	11
198	8
200	8
201	9
202	11
204	14
207	10
210	7
212	8
216	10
221	13
228	10
232	9
235	4
240	12
242	6
253	8
255	7
264	6
267	8
274	8
282	10
285	5
288	11
294	4
311	8
320	7
326	6
2	21
11	19
17	23
18	26
19	20
20	20
25	16
31	10
34	24
36	20
37	17
40	10
41	10
43	20
49	17
53	16
54	20
55	16
57	16
64	19
66	20
72	20
75	36
78	39
80	40
81	36
87	34
88	38
11	12
12	28
16	25
22	12
25	19
27	11
30	19
33	30
37	21
40	22
42	15
46	19
49	15
54	25
55	20
65	34
67	42
71	50
2	40
4	40
9	30
13	40
15	39
16	30
20	60
21	40
23	60
43	40
48	38
49	36
51	50
54	38
57	40
59	31
66	35
77	31
79	30
89	31
91	24
1	24
2	20
3	19
4	19
5	30
6	64
7	46
9	14
10	15
11	9
12	4
13	11
18	6
39	6
