# Supplementary material
Source: ML conference proceedings conference paper supplement (https://openreview.net/forum?id=L3yugOksj6)
Supplement: supplementary_material [file train.xls]

## Sheet: mate30
id	num
2	37
3	30
22	28
23	32
25	26
26	60
27	21
30	41
31	35
32	46
33	40
34	38
35	54
36	34
37	39
38	39
39	39
41	9
43	39
47	40
48	42
49	45
51	35
52	60
54	42
55	56
58	35
60	40
61	40
63	34
64	33
65	38
67	37
70	48
71	34
72	9
74	35
76	35
78	46
79	41
80	39
88	39
90	50
92	40
93	30
94	37
96	33
98	33
101	22
103	21

## Sheet: P30pro
id	num
1	7
2	10
3	6
4	5
9	5
13	7
16	5
17	7
18	6
20	4
22	5
25	3
26	4
28	9
30	6
34	3
35	6
39	10
40	10
44	6
46	7
52	5
56	6
57	5
58	9
59	6
60	5
61	4
62	12
64	3
65	8
67	11
68	6
69	7
71	5
72	8
74	5
75	6
76	7
79	7
80	6
82	9
83	6
84	10
87	5
88	5
89	4
90	6
92	6
94	5
100	6
107	6
108	10
109	8
110	11
111	10
112	12
113	8
114	12
116	17
117	7
119	11
120	10
122	10
124	17
129	6
130	10
131	10
133	13
135	13
137	7
141	10
142	27
143	15
144	30
146	7
151	15
153	6
154	6
157	10
159	9
161	5
162	10
167	16
169	12
170	7
171	9
173	7
174	7
175	7
177	21
178	10
179	12
180	13
183	14
185	6
187	7
188	9
192	9
194	8
196	7
199	14
208	9
209	7
213	8
214	10
215	10
217	7
222	13
223	10
225	9
230	7
231	11
233	9
236	10
237	11
238	14
243	11
244	6
247	6
248	11
258	11
259	6
266	9
269	8
271	12
272	6
273	9
279	10
281	6
283	10
284	4
286	4
287	6
291	5
292	7
295	4
298	5
303	8
308	15
310	10
312	7
314	6
315	5
316	6
319	11
321	7
322	9
323	14
325	6
327	7

## Sheet: iphonepm
id	num
3	17
4	20
5	16
6	22
7	24
9	20
10	19
15	29
21	20
22	18
23	20
24	19
26	19
27	19
28	24
29	10
30	10
33	23
35	19
38	20
39	16
42	10
44	20
45	17
46	18
47	18
48	21
50	17
51	19
52	16
56	16
58	19
59	16
60	17
61	15
62	20
63	17
65	20
67	16
68	16
69	18
70	14
71	15
74	35
76	40
77	31
79	44
82	38
83	37
84	42
85	37
86	35
89	35
90	34
92	42

## Sheet: vivo
id	num
2	15
3	30
8	22
9	25
10	15
13	20
14	15
15	19
18	15
20	30
21	9
23	11
24	15
28	15
29	17
31	21
32	28
34	13
35	18
36	16
38	17
39	19
41	15
43	21
45	30
47	27
48	15
52	17
53	16
56	21
57	44
58	40
62	31
63	25
68	35
72	35

## Sheet: xiaomi11pro
id	num
3	30
5	30
6	40
7	40
8	40
10	30
12	30
14	50
17	40
18	32
19	30
22	40
24	39
25	51
26	30
32	18
34	9
37	57
38	20
41	31
42	39
44	39
45	50
46	45
47	50
50	40
52	47
53	47
55	37
56	40
58	36
60	34
64	36
68	33
70	33
71	38
73	31
74	34
78	40
90	40

## Sheet: all
id	num
2	37
3	30
22	28
23	32
25	26
26	60
27	21
30	41
31	35
32	46
33	40
34	38
35	54
36	34
37	39
38	39
39	39
41	9
43	39
47	40
48	42
49	45
51	35
52	60
54	42
55	56
58	35
60	40
61	40
63	34
64	33
65	38
67	37
70	48
71	34
72	9
74	35
76	35
78	46
79	41
80	39
88	39
90	50
92	40
93	30
94	37
96	33
98	33
101	22
103	21
1	7
2	10
3	6
4	5
9	5
13	7
16	5
17	7
18	6
20	4
22	5
25	3
26	4
28	9
30	6
34	3
35	6
39	10
40	10
44	6
46	7
52	5
56	6
57	5
58	9
59	6
60	5
61	4
62	12
64	3
65	8
67	11
68	6
69	7
71	5
72	8
74	5
75	6
76	7
79	7
80	6
82	9
83	6
84	10
87	5
88	5
89	4
90	6
92	6
94	5
100	6
107	6
108	10
109	8
110	11
111	10
112	12
113	8
114	12
116	17
117	7
119	11
120	10
122	10
124	17
129	6
130	10
131	10
133	13
135	13
137	7
141	10
142	27
143	15
144	30
146	7
151	15
153	6
154	6
157	10
159	9
161	5
162	10
167	16
169	12
170	7
171	9
173	7
174	7
175	7
177	21
178	10
179	12
180	13
183	14
185	6
187	7
188	9
192	9
194	8
196	7
199	14
208	9
209	7
213	8
214	10
215	10
217	7
222	13
223	10
225	9
230	7
231	11
233	9
236	10
237	11
238	14
243	11
244	6
247	6
248	11
258	11
259	6
266	9
269	8
271	12
272	6
273	9
279	10
281	6
283	10
284	4
286	4
287	6
291	5
292	7
295	4
298	5
303	8
308	15
310	10
312	7
314	6
315	5
316	6
319	11
321	7
322	9
323	14
325	6
327	7
3	17
4	20
5	16
6	22
7	24
9	20
10	19
15	29
21	20
22	18
23	20
24	19
26	19
27	19
28	24
29	10
30	10
33	23
35	19
38	20
39	16
42	10
44	20
45	17
46	18
47	18
48	21
50	17
51	19
52	16
56	16
58	19
59	16
60	17
61	15
62	20
63	17
65	20
67	16
68	16
69	18
70	14
71	15
74	35
76	40
77	31
79	44
82	38
83	37
84	42
85	37
86	35
89	35
90	34
92	42
2	15
3	30
8	22
9	25
10	15
13	20
14	15
15	19
18	15
20	30
21	9
23	11
24	15
28	15
29	17
31	21
32	28
34	13
35	18
36	16
38	17
39	19
41	15
43	21
45	30
47	27
48	15
52	17
53	16
56	21
57	44
58	40
62	31
63	25
68	35
72	35
3	30
5	30
6	40
7	40
8	40
10	30
12	30
14	50
17	40
18	32
19	30
22	40
24	39
25	51
26	30
32	18
34	9
37	57
38	20
41	31
42	39
44	39
45	50
46	45
47	50
50	40
52	47
53	47
55	37
56	40
58	36
60	34
64	36
68	33
70	33
71	38
73	31
74	34
78	40
90	40
