# Supplementary material
Source: ML conference proceedings conference paper supplement (https://openreview.net/forum?id=L3yugOksj6)
Supplement: supplementary_material [file transition.xls]

## Sheet: mate30
id	num

## Sheet: P30pro
id	num
24	4
267	8

## Sheet: iphonepm
id	num
34	24
36	20
37	17
72	20

## Sheet: vivo
id	num
55	20
65	34

## Sheet: xiaomi13
id	num
